# Supplementary material for: Versatile fabrication of a passivation material, solute PEDOT:PSS, for a c-Si substrate using alcoholic solvents
Source: Royal Society of Chemistry journal article supplement (doi:10.1039/d0se01700k), 2020-12-21
Supplement: d0se01700k1.pdf [file d0se01700k1.pdf]

All solute PEDOT:PSS mixtures were prepared by mixing a 500 $\mu$ L solution of pristine PEDOT:PSS (Heraeus Clevis PH 1000) with Triton surfactants (Sigma Aldrich) and different amounts of ethanol and IPA (Fujifilm Wako Pure Chemical Co.) using different volume ratios: 1:3, 1:7, and 1:11, where PEDOT:PSS is the lesser volume component of the solution. The obtained solutions were sonicated for 24 hours at room temperature before thin film preparation. The glass substrates (1.5 $\times$ 1.5 cm<sup>2</sup>) were cleaned by acetone, ethanol and DI water under sonification for 15 min. And then, they were annealed at 170 °C for 20 min before spin-coating process. The ethanol/ IPA solute PEDOT:PSS was spun onto glass slides at 6000 rpm for 60 s, followed by annealing at 170 °C in air for 20 min. Silver paste was applied at four corners of each solute PEDOT:PSS thin film for Hall measurement (Ecopia HMS-3000) using the Van der Pauw method. The thickness of solute PEDOT:PSS on glass was evaluated using the spectroscopic ellipsometry (J. A. Woollam Co.).

After cleaning with acetone, ethanol, and deionized water, and removing the native silicon oxide by 5 % HF etching, both sides of polished n-type Czochralski Si (100) substrates (300  $\mu$ m, 1–5  $\Omega\cdot$ cm) were coated with solute PEDOT:PSS [Fig. 1(a)]. To evaluate the passivation of ethanol or IPA solute PEDOT:PSS, effective carrier lifetime measurement of c-Si substrate was carried out using the microwave photo-conductivity decay ( $\mu$ PCD) under an injection level of  $1\times 10^{14}$  cm<sup>-3</sup> (KOBELCO, LTA1512EP). Furthermore, quasi-steady state photoconductivity (QSSPC) (Sinton Instruments WCT120) was applied for **conductive PEDOT:PSS/c-Si** and **PEDOT:PSS/ c-Si/ solute PEDOT:PSS** to characterize the potential of hybrid c-Si solar cells using ethanol / IPA solute PEDOT:PSS at the backside [Fig. 1(b) and 1(c)]. Herein, the conductive PEDOT:PSS was formed by mixing it with small amount of Ethylene Glycol (Wako, 058-00986) and it possesses high conductivity of 850 S/cm with the thickness of 35 nm. The  $J_0$ , implied  $V_{OC}$  and effective carrier lifetime were extracted using injection level of  $1\times 10^{15}$  cm<sup>-3</sup>. Fabrication of c-Si solar cells were completed with thermal evaporation of 200-nm-thick Al film and 300-nm-thick Ag onto backside and front side of Si solar cells (ULVAC Kiko, Inc VPC-260F), respectively. Current density-voltage (J-V) characteristics were measured by a JASCO YQ-250BX solar simulator under 1-sun illumination, which was also integrated with a monochromator, power meter and Keithley source meter for external quantum efficiency (EQE) measurements.

**Table S1:** Chemical structure and physical properties of organic solvents, methanol, ethanol and isopropanol.

| Name        | Chemical structure                                 | Dielectric constant <sup>a</sup> | Absolute viscosity/cp <sup>b</sup> |
|-------------|----------------------------------------------------|----------------------------------|------------------------------------|
| Methanol    | CH <sub>3</sub> OH                                 | 32.6                             | 0.59                               |
| Ethanol     | CH <sub>3</sub> CH <sub>2</sub> OH                 | 22.4                             | 1.2                                |
| Isopropanol | CH <sub>3</sub> CH <sub>2</sub> CH <sub>2</sub> OH | 18.3                             | 1.77                               |

<sup>a, b</sup>The dielectric constant values and absolute viscosity of neat solvents obtained from ref. 1 and ref. 2

**Figure S1:** Digital images of different solute PEDOT:PSS on glass

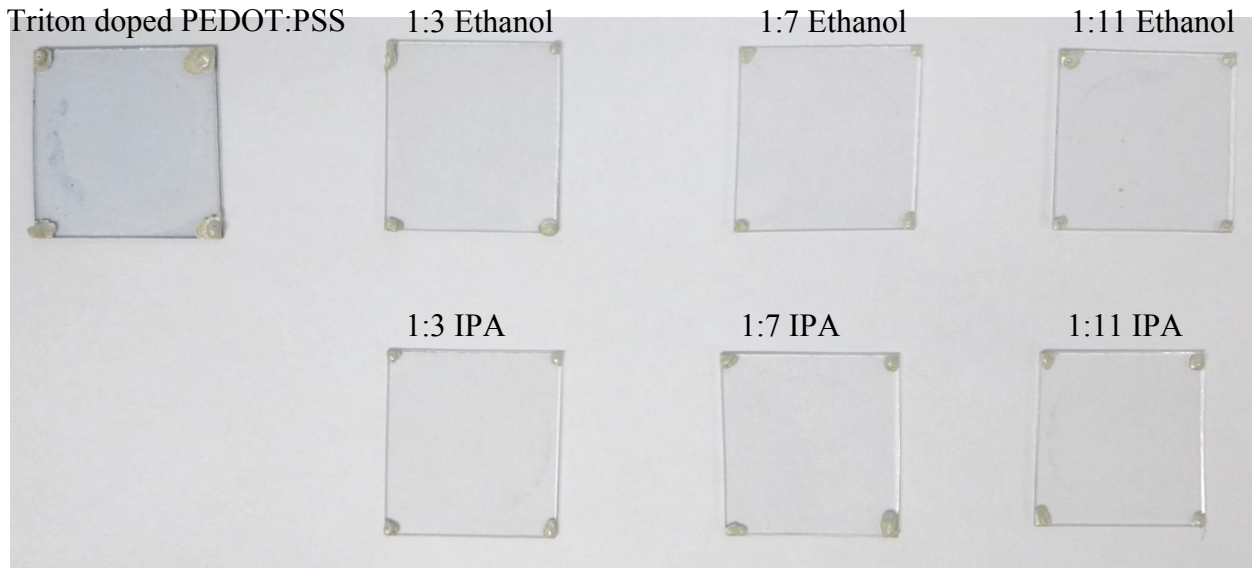

**Table S2:** Thickness, sheet resistance and conductivity of ethanol and IPA solute PEDOT:PSS with volume ratio of 1:3, 1:7 and 1:11.

|                | Ethanol solute PEDOT:PSS |       |       | IPA solute PEDOT:PSS |      |       |
|----------------|--------------------------|-------|-------|----------------------|------|-------|
|                | 1:3                      | 1:7   | 1:11  | 1:3                  | 1:7  | 1:11  |
| Volume ratio   | 1:3                      | 1:7   | 1:11  | 1:3                  | 1:7  | 1:11  |
| S (S/cm)       | 2.1                      | 0.024 | 0.018 | 2.25                 | 0.42 | 0.075 |
| R (MΩ/□)       | 3.0                      | 64    | 70    | 0.97                 | 3.3  | 13    |
| Thickness (nm) | 15.2                     | 8.42  | 5.79  | 9.16                 | 7.15 | 5.32  |

Figure S2: Transmittance of ethanol/ IPA solute PEDOT:PSS on glass with volume ratio of 1:3, 1:7 and 1:11.

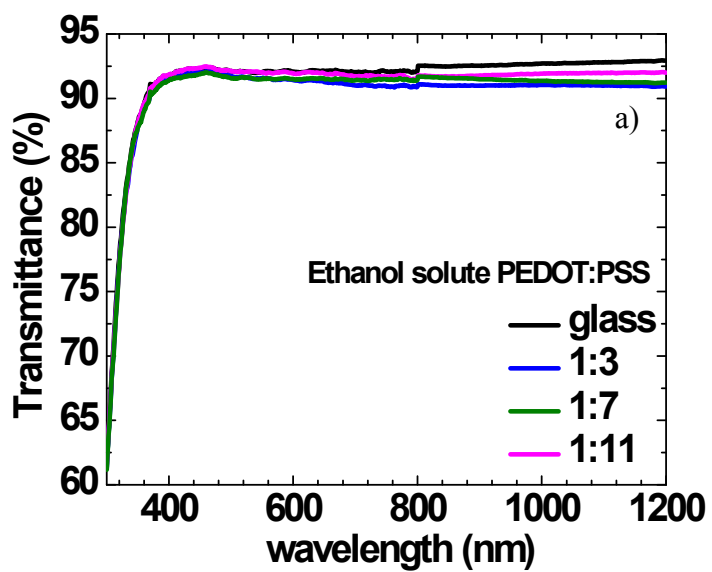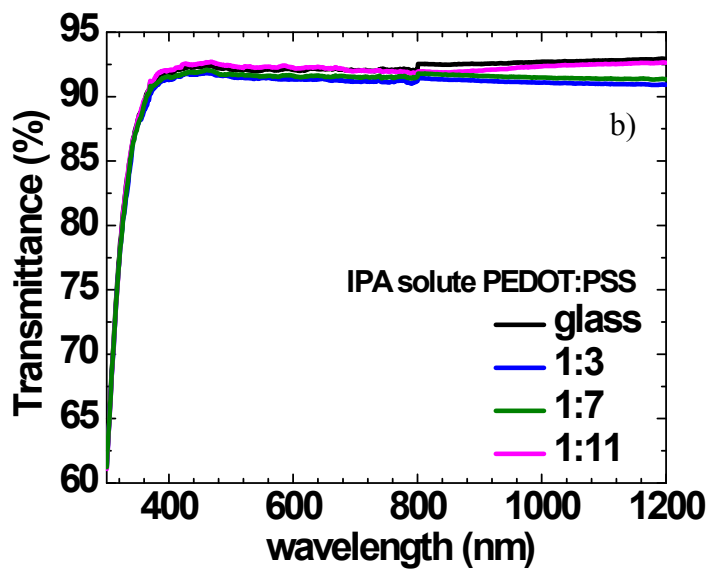

**Table S3:** Effective carrier lifetimes in average and in maximum extracted from c-Si passivated by ethanol/ IPA solute PEDOT:PSS.

|                              | Ethanol soluting PEDOT:PSS |            |             | IPA soluting PEDOT:PSS |             |             |
|------------------------------|----------------------------|------------|-------------|------------------------|-------------|-------------|
|                              | 1:3                        | 1:7        | 1:11        | 1:3                    | 1:7         | 1:11        |
| Volume ratio                 | <b>1:3</b>                 | <b>1:7</b> | <b>1:11</b> | <b>1:3</b>             | <b>1:7</b>  | <b>1:11</b> |
| Highest LT ( $\mu\text{s}$ ) | <b>1096</b>                | <b>956</b> | 576         | 622                    | <b>1072</b> | 504         |
| Average LT ( $\mu\text{s}$ ) | 657                        | 630        | 324         | 390                    | 718         | 312         |

**Table S4:** Key parameters of *PEDOT:PSS/ c-Si/ solute PEDOT:PSS* extracted from QSSPC measurements.

|                                                                                                | ref   | Ethanol solute PEDOT:PSS |             | IPA solute PEDOT:PSS |             |
|------------------------------------------------------------------------------------------------|-------|--------------------------|-------------|----------------------|-------------|
| Volume ratio                                                                                   |       | <b>1:7</b>               | <b>1:11</b> | <b>1:7</b>           | <b>1:11</b> |
| $\tau_{\text{eff}}$ ( $\mu\text{s}$ ) at injection level of $1 \times 10^{15} \text{ cm}^{-3}$ | 18.68 | 99.30                    | 40.63       | 103.15               | 37.79       |
| $J_0$ ( $\text{A/cm}^2$ ) $\times 10^{-12}$                                                    | 1.06  | 0.303                    | 0.665       | 0.255                | 0.952       |
| Implied $V_{\text{OC}}$ (mV)                                                                   | 547   | 597                      | 564         | 599                  | 564         |

**Figure S3:** a) *J-V* curves; b) External quantum efficiency of PEDOT:PSS/ Si substrate/ solute PEDOT:PSS on the backside.

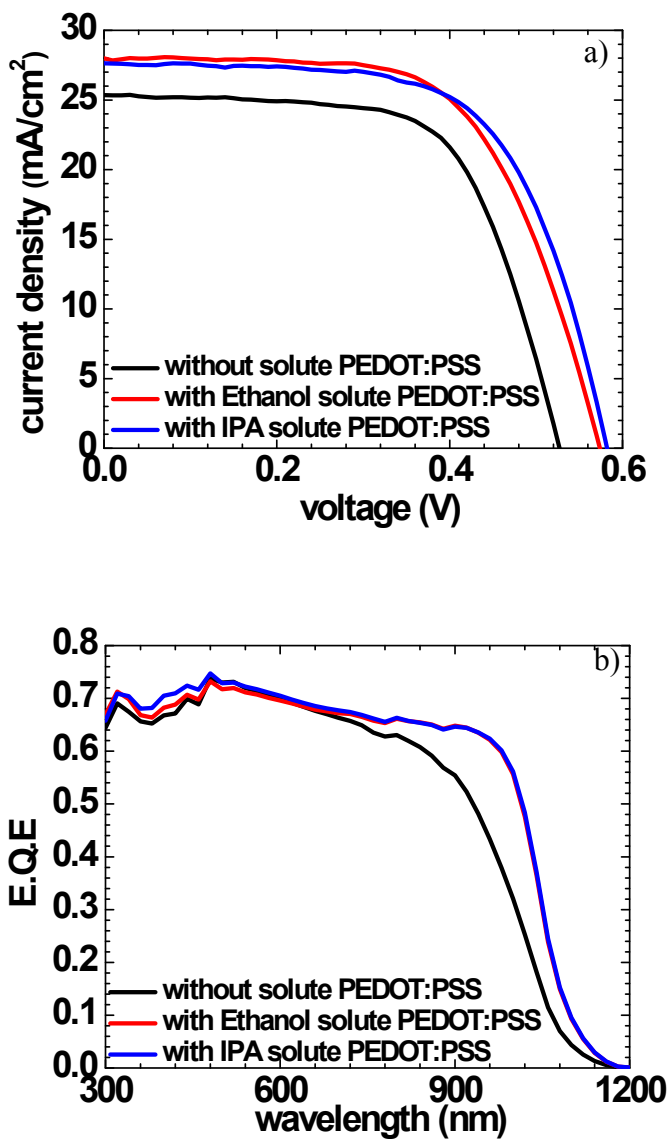

**Table S5:** Key *J-V* parameters of PEDOT:PSS/ c-Si/ solute PEDOT:PSS

|                                      | $J_{SC}$ (mA/cm <sup>2</sup> ) | $V_{OC}$ (V) | FF   | $Eff$ |
|--------------------------------------|--------------------------------|--------------|------|-------|
| <b>Without solute PEDOT:PSS</b>      | 25.35                          | 0.527        | 0.65 | 8.69  |
| <b>With ethanol solute PEDOT:PSS</b> | 27.99                          | 0.574        | 0.62 | 10.03 |
| <b>With IPA solute PEDOT:PSS</b>     | 27.63                          | 0.582        | 0.64 | 10.26 |

Reference:

- a. [https://en.wikipedia.org/wiki/Main\\_Page](https://en.wikipedia.org/wiki/Main_Page)
- b. Y. Xia and J. Ouyang, *Journal of Materials Chemistry*, 2011, **21**, 4927–4936.
